# Supplementary material
Source: PubMed Central journal article supplement (PMC4566261)
Supplement: 10.1534_115.178061_genetics.115.178061-2.pdf [file 10.1534_115.178061_genetics.115.178061-2.pdf]

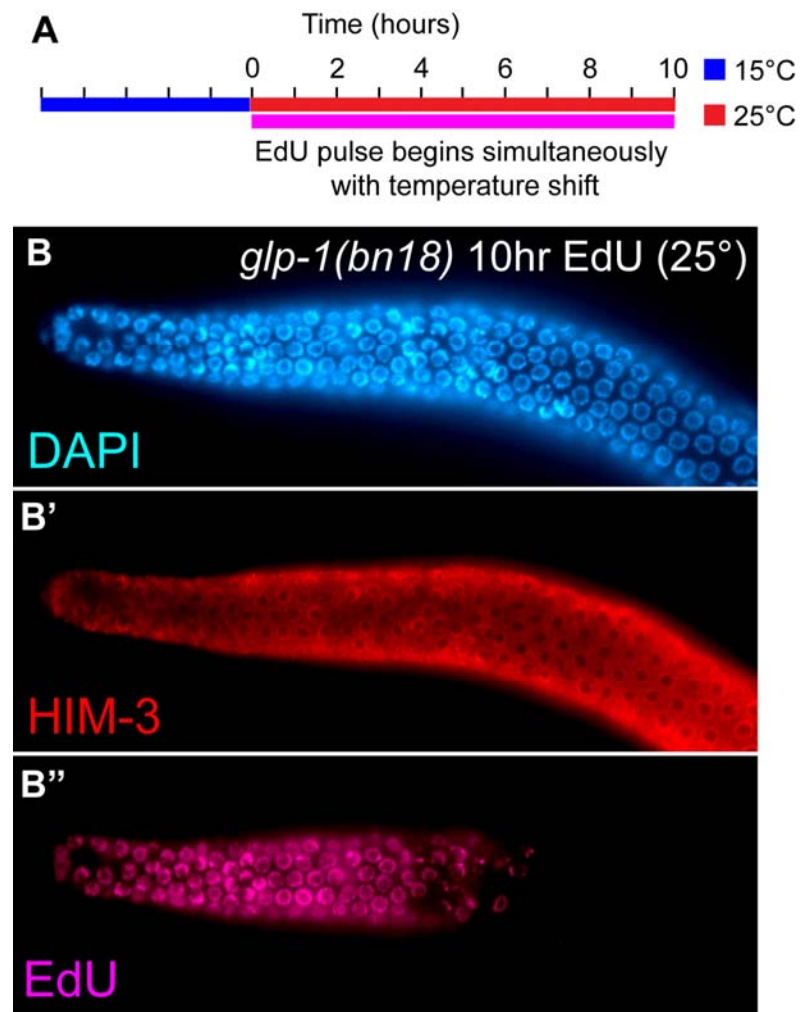

**Figure S4** PZ cells in mitotic G2 undergo mitosis and meiotic S-phase prior to meiotic entry. (A) *glp-1(bn18)* mutants were shifted to restrictive temperature and simultaneously given a continuous EdU labelling, as indicated. (B) Representative image of the distal region of a germline after the 10 hour EdU labelling at restrictive temperature. Note that all germ cells have entered meiosis and all germ cells within ~15 cell diameters of the distal tip are EdU positive.
