# Supplementary material
Source: PubMed Central journal article supplement (PMC4566261)
Supplement: 10.1534_115.178061_genetics.115.178061-3.pdf [file 10.1534_115.178061_genetics.115.178061-3.pdf]

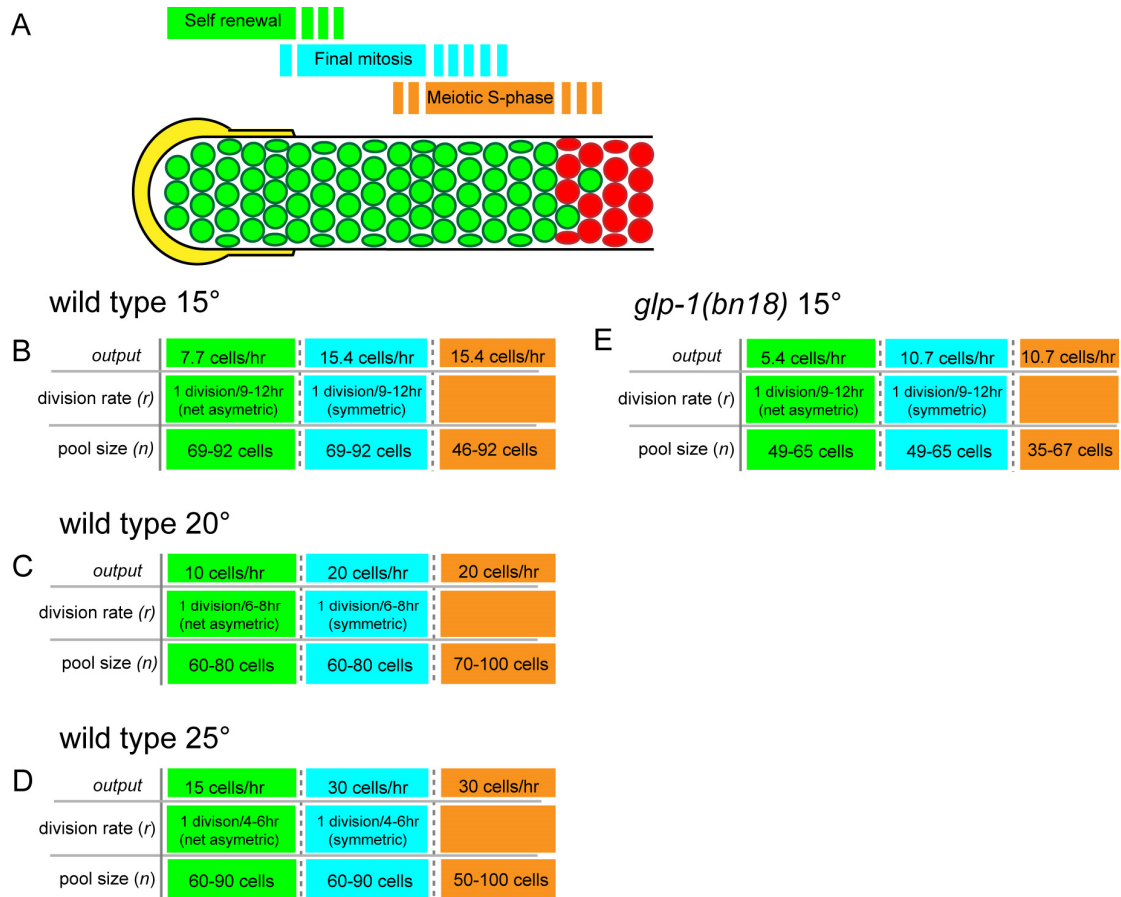

**Figure S7** Models of proliferative zone dynamics in wild type at different temperatures and for the *glp-1(bn18)* mutant at 15°. (A) Proliferative zone cells (green) can be assigned to three separate pools: a self renewal pool, final mitosis pool and meiotic S-phase pool (see Discussion, Figure 10). Based on the model of proliferative zone dynamics presented in the Discussion, we assign predicted pool sizes for the adult wild type proliferative zone at 15°, 20° and 25° (B-D) and *glp-1(bn18)* mutant at 15° (E) based on the observed output and division rate. The observed output and division rate of wild type at 20° and 25° (C-D) is based on Fox *et al* 2011.
