# Supplementary material
Source: PubMed Central journal article supplement (PMC4566261)
Supplement: 10.1534_115.178061_genetics.115.178061-4.pdf [file 10.1534_115.178061_genetics.115.178061-4.pdf]

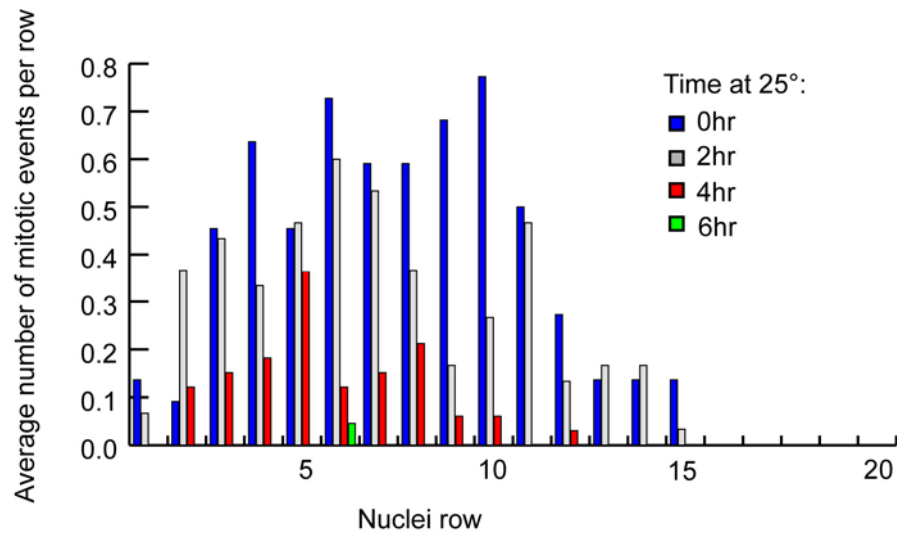

**Figure S3** Distribution of M-phase in *glp-1(bn18)* shifted to restrictive temperature. *glp-1(bn18)* animals were shifted from 15° to 25° and dissected germlines were stained with pH3 to label M-phase. The position of M-phase cells were scored based on position, in cell diameters, from the distal tip. The histogram plots the average number of M-phase cells per row. 0 hours,  $n=23$ ; 2 hours,  $n=30$ ; 4 hours,  $n=33$ ; 6 hours,  $n=35$  (germlines).
