# Supplementary material
Source: PubMed Central journal article supplement (PMC4566261)
Supplement: 10.1534_115.178061_genetics.115.178061-5.pdf [file 10.1534_115.178061_genetics.115.178061-5.pdf]

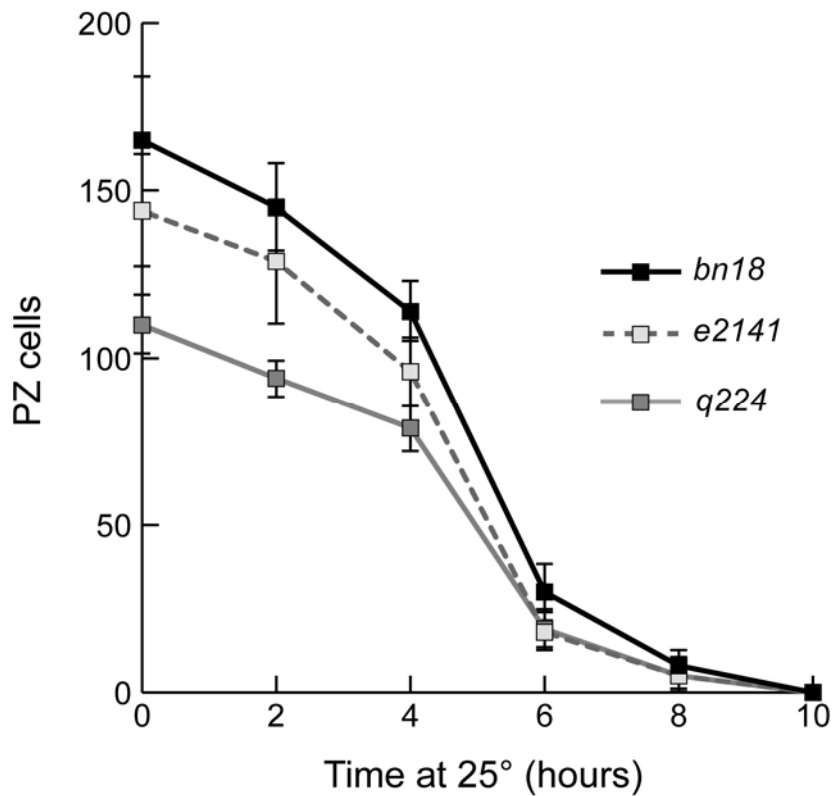

**Figure S2** Comparison of meiotic entry kinetics of *glp-1(ts)* mutants shifted to restrictive temperature (25°). Adults were raised at permissive temperature (15°), staged to be 24 hours past L4 and shifted to restrictive temperature (25°). Animals were harvested after the indicated period at restrictive temperature and stained with REC-8 and HIM-3 antibody to detect PZ cells versus meiotic prophase cells. The number of PZ cells was counted and the average per germline plotted versus time. Although *e2141* and *q224* mutants had fewer proliferative zone cells at permissive temperature steady state than *bn18*, they displayed similar kinetics of proliferative zone differentiation following shift to restrictive temperature. For each time point, at least eight germlines were scored. Error bars indicate standard deviation.
