# Supplementary material
Source: PubMed Central journal article supplement (PMC4566261)
Supplement: 10.1534_115.178061_genetics.115.178061-6.pdf [file 10.1534_115.178061_genetics.115.178061-6.pdf]

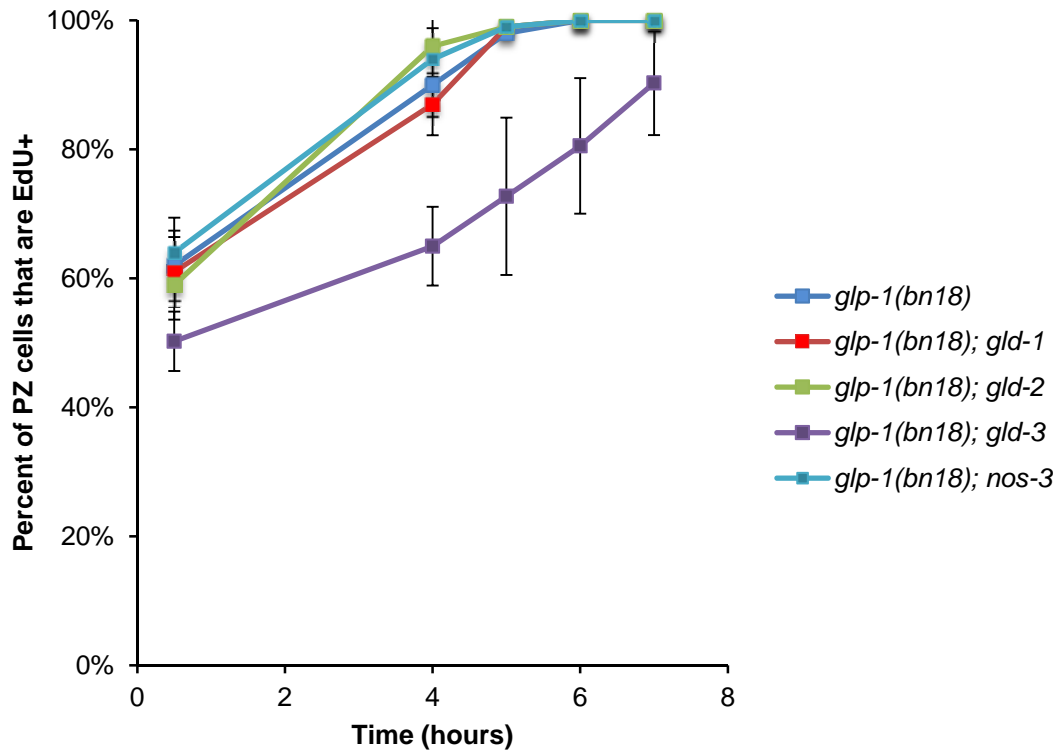

**Figure S6** Analysis of the length of G2+M+G1 in double mutants affecting the GLD-1 or GLD-2 pathways. Animals were staged to 24 hours past L4, transferred to EdU plates, dissected after the indicated EdU labelling time and stained for EdU incorporation and with REC-8 antibody to identify PZ cells. The percent of PZ cells that were EdU positive was scored versus time of EdU labelling. The length of G2+M+G1 is equal to the length of EdU pulse required to label all PZ cells with EdU. For all double mutants, except *glp-1(bn18); gld-3*, the length of G2+M+G1 was 5 hours. In *gld-3; glp-1(bn18)*, some PZ cells remained EdU negative after 5 hours, indicating a longer G2+M+G1 and thus a longer cell cycle length. All experiments were at 15°. The alleles used for the meiotic entry genes are likely null (see Materials and Methods).
