# Supplementary material
Source: PubMed Central journal article supplement (PMC4566261)
Supplement: 10.1534_115.178061_genetics.115.178061-7.pdf [file 10.1534_115.178061_genetics.115.178061-7.pdf]

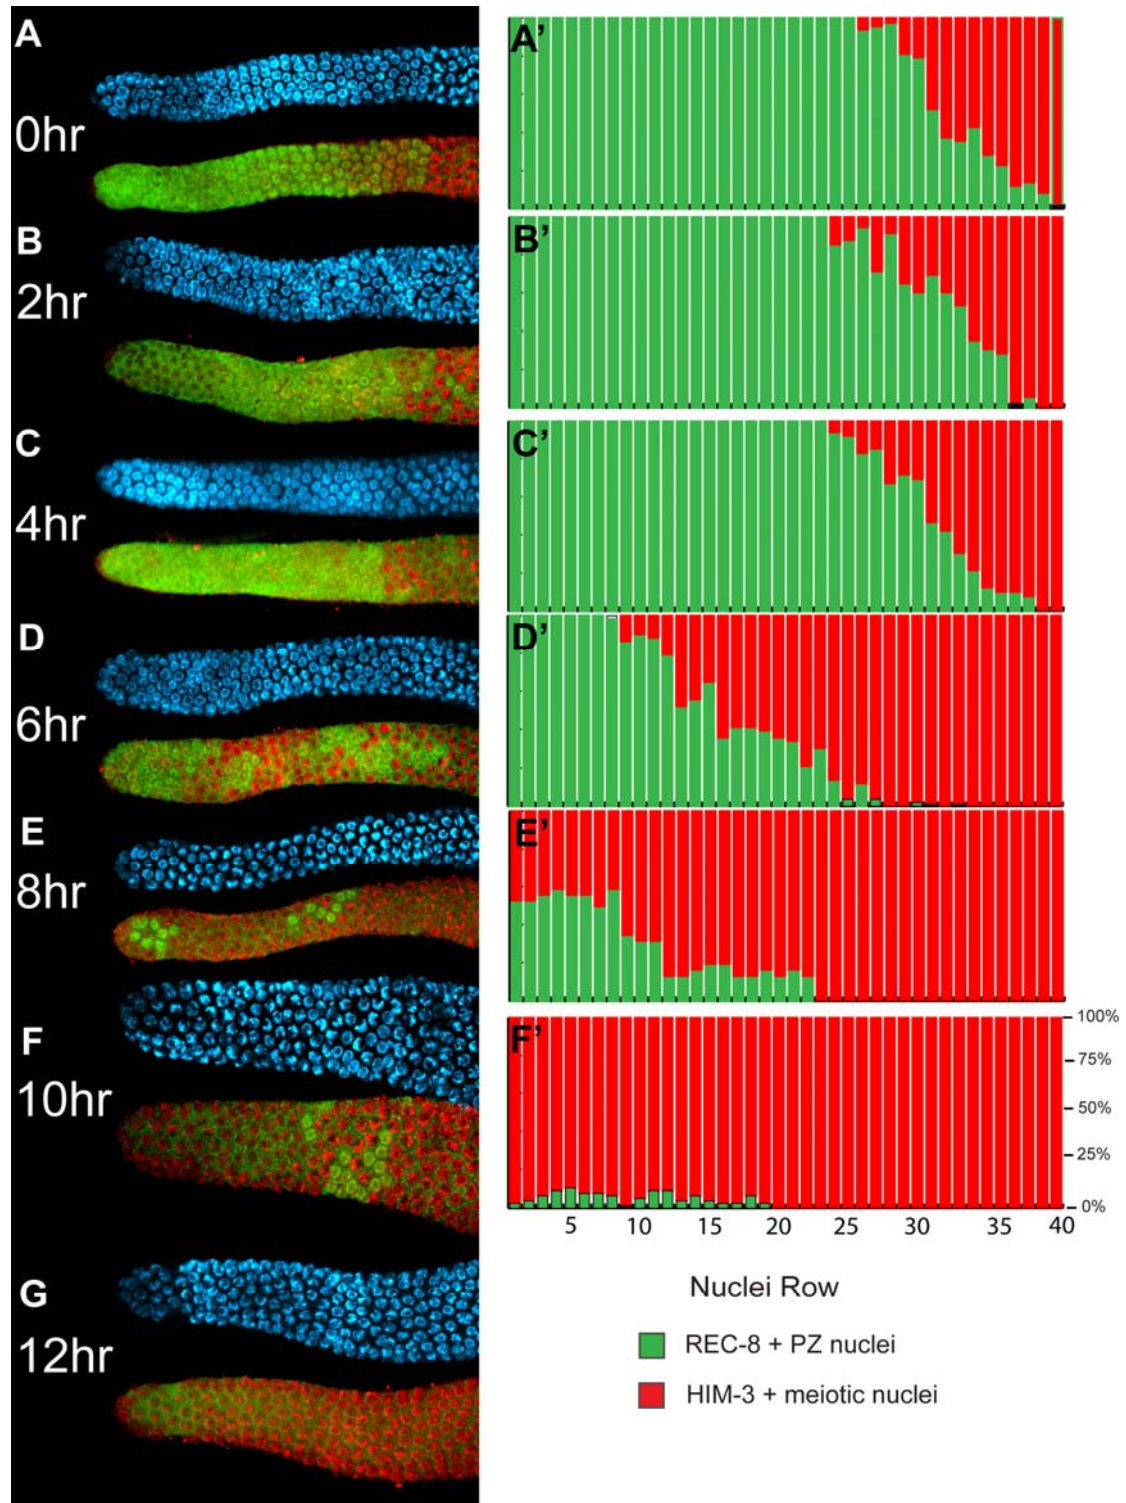

**Figure S5** Distribution of PZ cells in *glp-1(bn18); gld-2* double mutants shifted to restrictive temperature. *glp-1(bn18); gld-2* mutants were shifted to the restrictive temperature (25°) for the indicated time. (A-G) Distal region of representative germlines stained with DAPI (blue), REC-8 antibody (green) and HIM-3 antibody (red). (A'-F') Graphs show the percentage of cells that are REC-8 positive (green) or HIM-3 positive (red) within cell rows defined by distance from the distal tip.
