# Supplementary material
Source: PubMed Central journal article supplement (PMC4566261)
Supplement: 10.1534_115.178061_genetics.115.178061-8.pdf [file 10.1534_115.178061_genetics.115.178061-8.pdf]

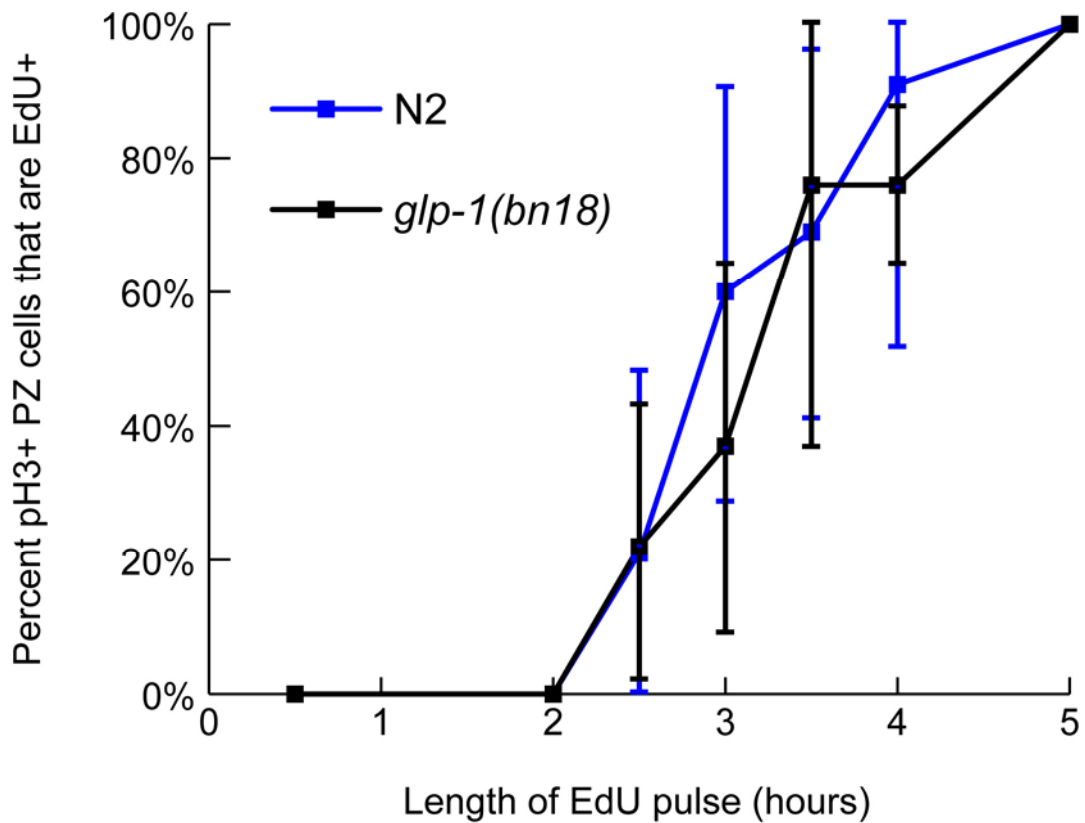

**Figure S1** Analysis of G2 length in *glp-1(bn18)*. Animals were fed EdU labelled bacteria for the indicated length of time at 15° and subsequently harvested and dissected. Germlines were stained to detect EdU incorporation and with pH3 antibody to detect PZ cells in M-phase. The graph displays the percentage of M-phase cells that were EdU positive versus length of EdU pulse. Since EdU is incorporated during S-phase, the length of time required for EdU labelled cells to reach M-phase provides an estimate of the length of G2. At ~3 hours, 50% of M-phase cells in both wild type N2 and *glp-1(bn18)* were EdU positive, and at 5 hours, 100% were EdU positive. This indicates that for both N2 and *glp-1(bn18)* the median and maximum length of G2 is 3 and 5 hours, respectively. For each time point, at least 10 germlines were scored. Error bars show standard deviation.
